# Supplementary material for: Magnetic nanoparticle modified chitosan for surface enhanced laser desorption/ionization mass spectrometry of surfactants
Source: Royal Society of Chemistry journal article supplement (doi:10.1039/c7ra05982e), 2017-01-01

## Supplementary Figures Captions

**Figure S1.** Chemical structure and molecular weights of the investigated surfactants.

**Figure S2.** Mass spectrum of sodium stearate using CTS@Fe<sub>3</sub>O<sub>4</sub> MNPs

**Figure S3.** Tap water analysis of mixed surfactants using DHB

**Figure S4.** Tap water analysis of mixed surfactants using CTS@Fe<sub>3</sub>O<sub>4</sub> MNPs

**Figure S1.**

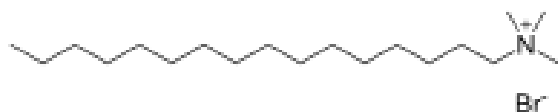

**Hexadecyl trimethyl ammonium bromide  
(364 Da)**

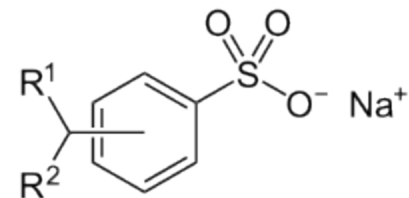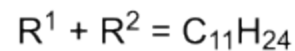

**Sodium dodecylbenzenesulfonate (SDBS)  
(348 Da)**

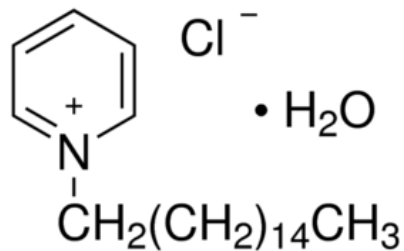

**Cetylpyridinium chloride  
(358 Da)**

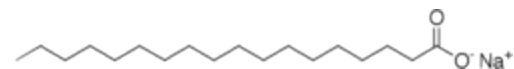

**Sodium stearate  
(306 Da)**

Figure S2.

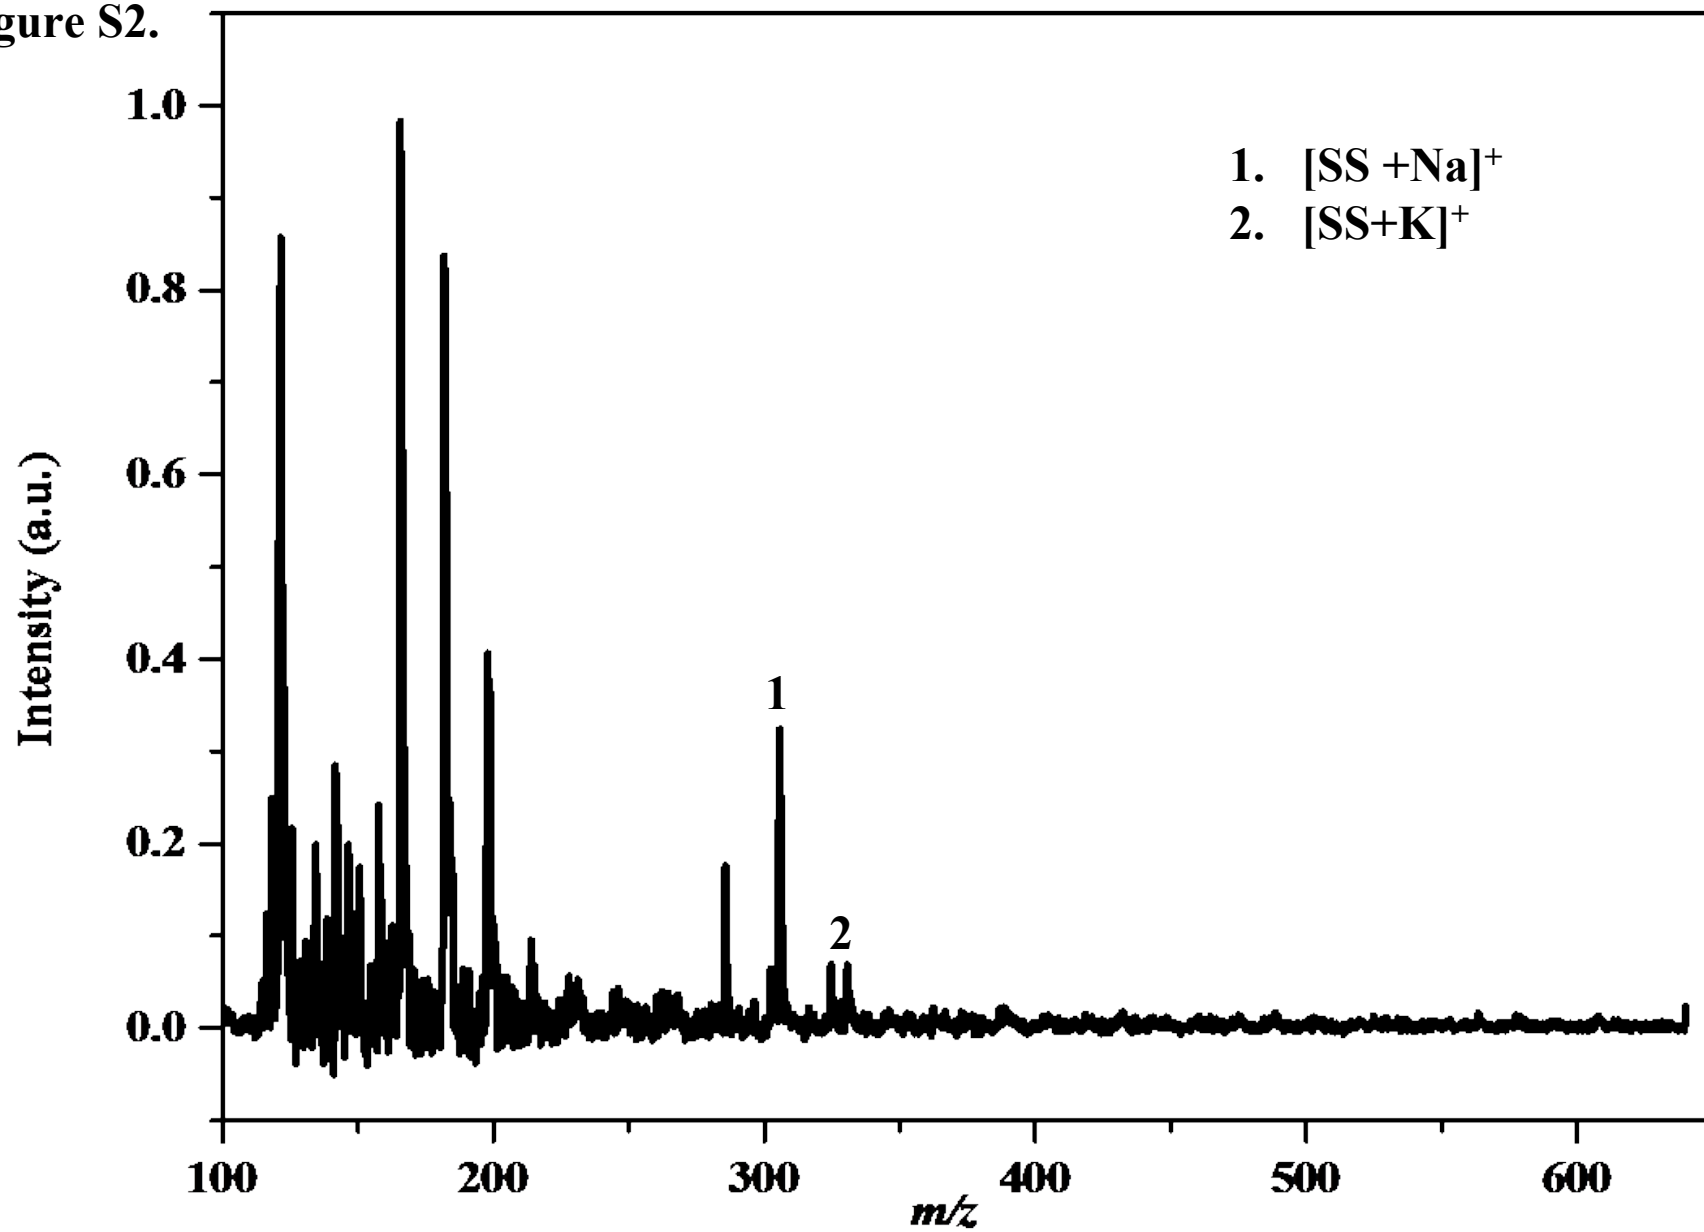

**Figure S3.**

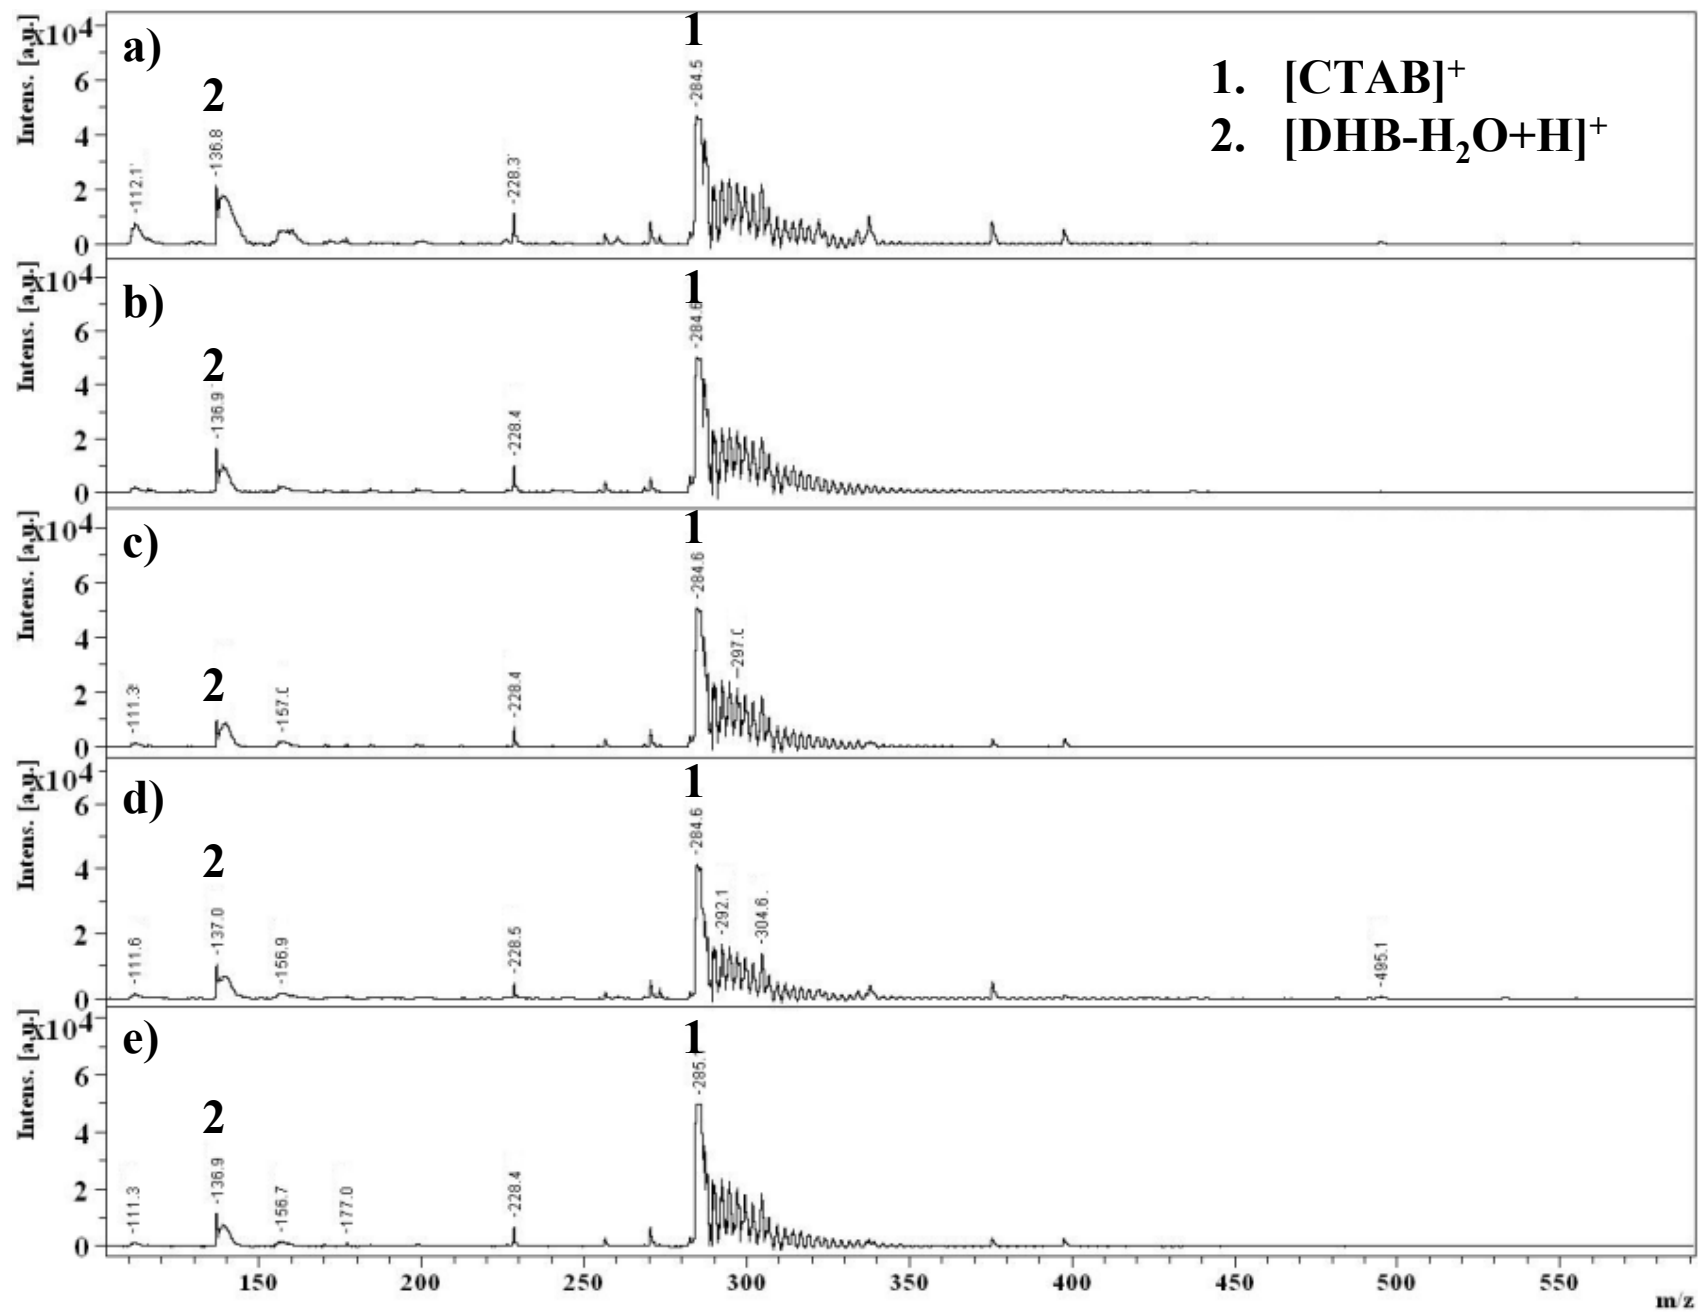

Figure S4.

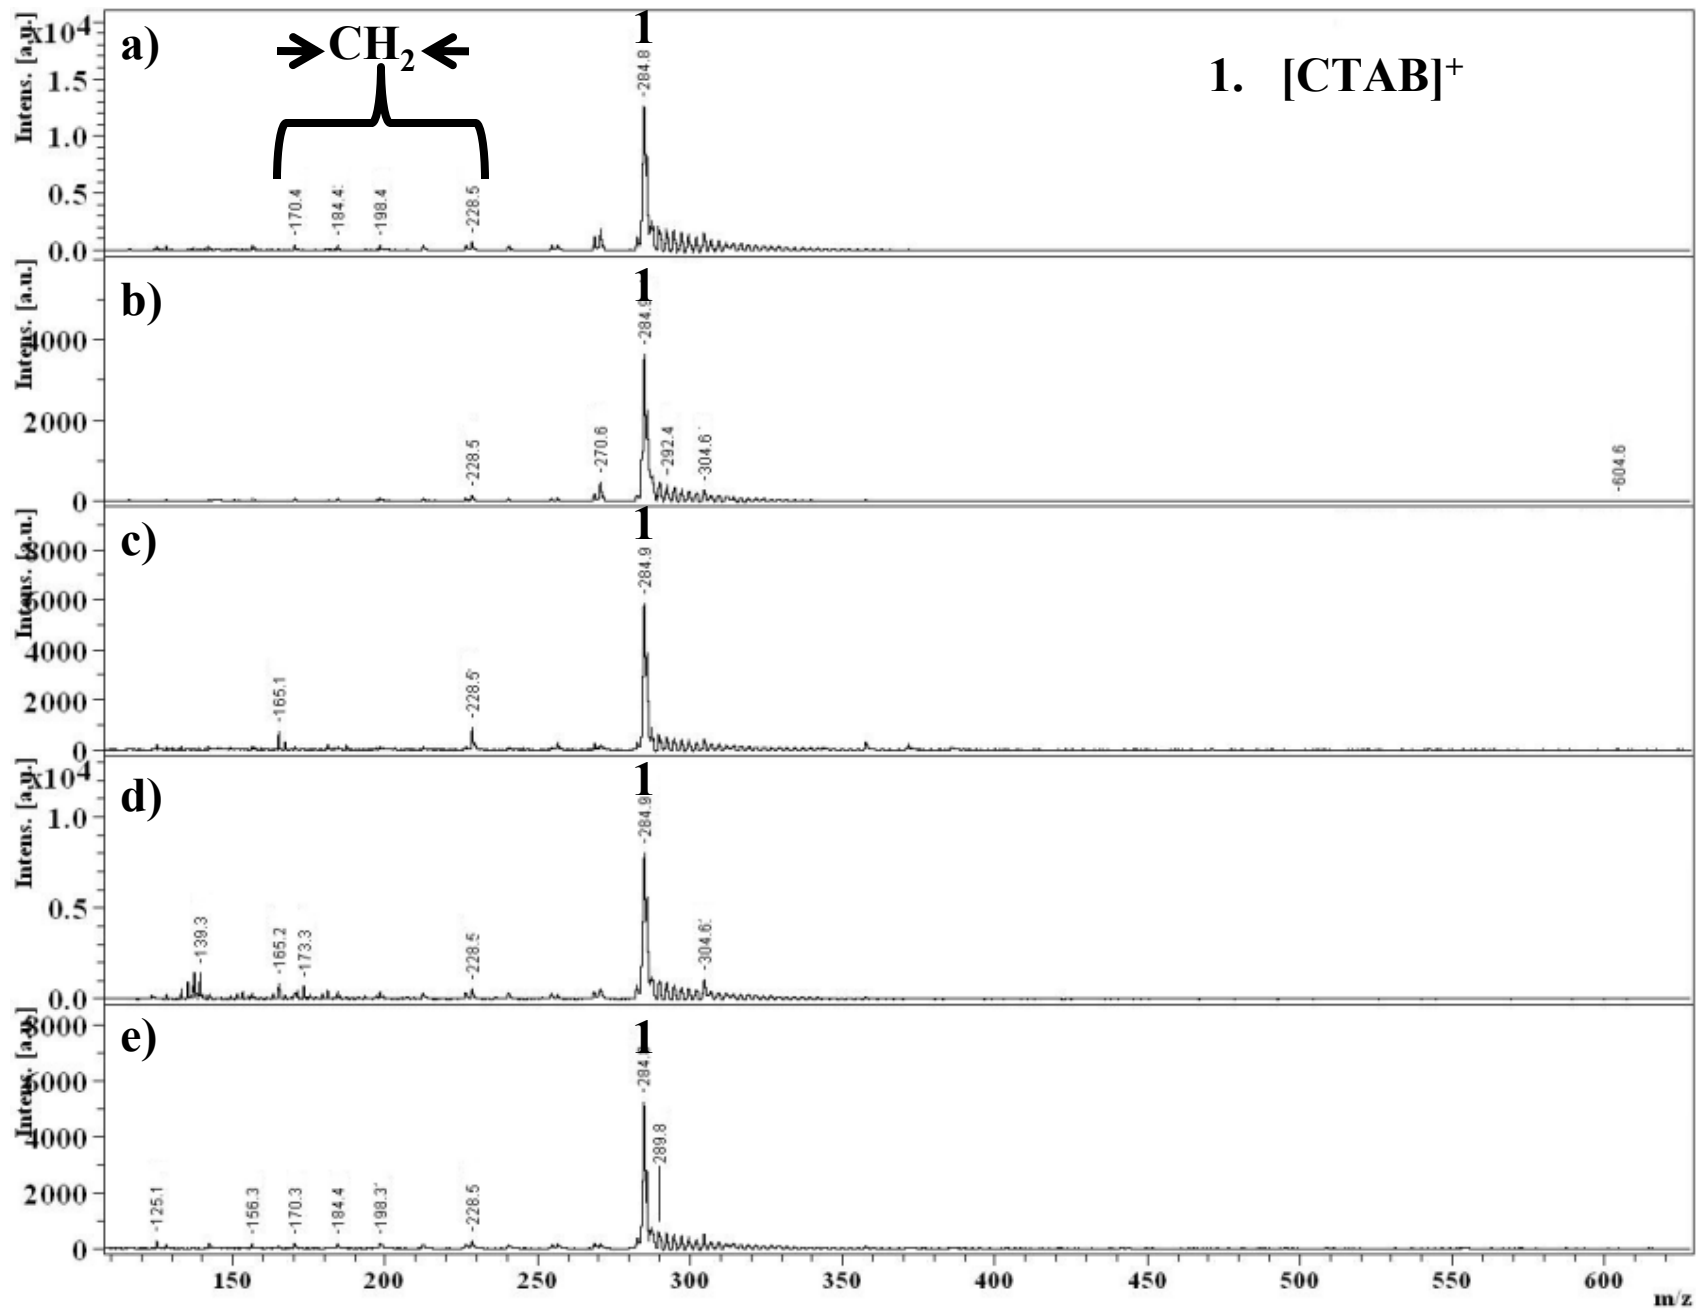

Supplement: c7ra05982e1.pdf [file c7ra05982e1.pdf]
